# Supplementary material
Source: PubMed Central journal article supplement (PMC2890707)
Supplement: 1000917107_pnas.201000917SI.pdf [file 1000917107_pnas.201000917SI.pdf]

# Supporting Information

Chen et al. 10.1073/pnas.1000917107

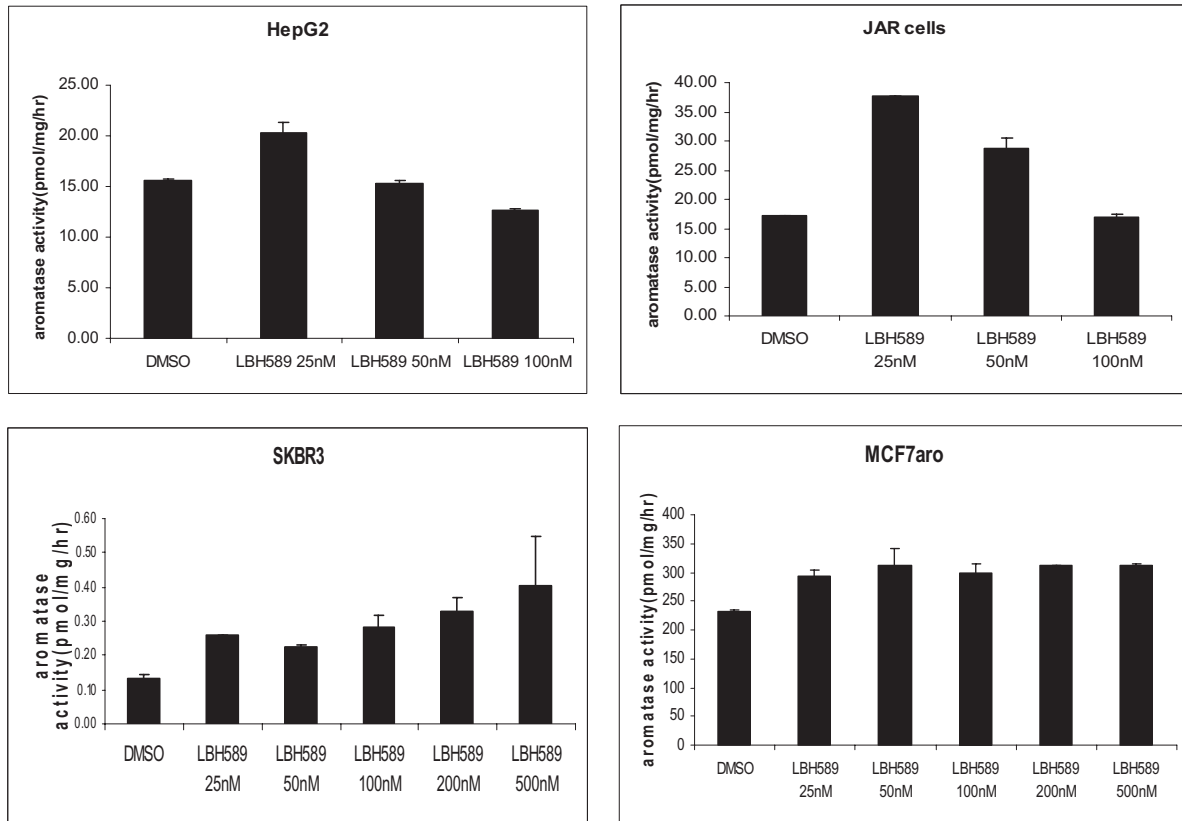

**Fig. S1.** Effect of LBH589 on aromatase activity/expression in different cell types. The HepG2, JAR, SKBR3, and MCF7aro cells were treated with LBH589 at indicated concentrations for 24 h. After treatment, the cells were washed with PBS, and aromatase activity was measured.

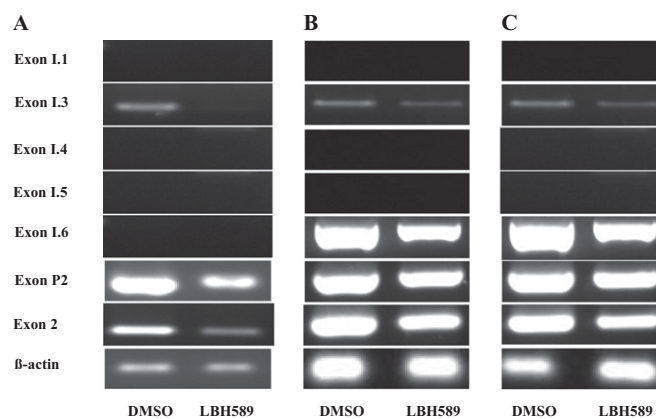

**Fig. S2.** Exon I-specific RT-PCR analysis to determine the effect of LBH589 on aromatase gene expression. H295R (A), MCF7 (B), and MCF7/Her2 (C) cells were treated with LBH589 (50 nM) or with DMSO as a control for 24 h. After treatment, total RNA was isolated; 5  $\mu$ g of total RNA was used for each RT-PCR run. The  $\beta$ -actin mRNA was amplified as an internal control. The size of the detected PCR products for exons I.1, I.3, I.4, I.5, I.6, PII, and II and  $\beta$ -actin were 256, 333, 223, 216, 1037, 234, 169, and 825 bp, respectively.
